# Supplementary material for: Rindera graeca (A. DC.) Boiss. & Heldr. (Boraginaceae) In Vitro Cultures Targeting Lithospermic Acid B and Rosmarinic Acid Production
Source: MDPI journal article supplement (doi:10.3390/molecules28124880), 2023-06-20

# ***Rindera graeca* (A. DC.) Boiss. & Heldr. (Boraginaceae) in vitro cultures targeting lithospermic acid B and rosmarinic acid production**

Katarzyna Sykłowska-Baranek <sup>1\*</sup>, Małgorzata Gawel <sup>1</sup>, Łukasz Kuźma <sup>2</sup>, Beata Wileńska <sup>3,4</sup>, Mateusz Kawka <sup>1</sup>, Małgorzata Jeziorek <sup>1</sup>, Konstantia Graikou <sup>5</sup>, Ioanna Chinou <sup>5</sup>, Ewa Szyszko <sup>1</sup>, Piotr Stępień <sup>1</sup>, Patryk Zakrzewski <sup>1</sup> and Agnieszka Pietrosiuk <sup>1</sup>

<sup>1</sup> <sup>1</sup>Department of Pharmaceutical Biology, Faculty of Pharmacy, Medical University of Warsaw, 1 Banacha St., 02-097 Warsaw, Poland; mgawel1@wum.edu.pl (M.G.); mateusz.kawka@wum.edu.pl (M.K.); mjeziorek@wum.edu.pl (M.J.); pryzmik16@op.pl (E.S.); piotrste1@wp.pl (P.S.); patrol20013@gmail.com (P.Z.); agnieszka.pietrosiuk@wum.edu.pl (A.P.)

<sup>2</sup> Department of Biology and Pharmaceutical Botany, Faculty of Pharmacy, Medical University of Łódź, 1 Muszyńskiego, 90-151 Łódź, Poland; lukasz.kuzma@umed.lodz.pl

<sup>3</sup> Faculty of Chemistry, University of Warsaw, 1 Pasteura St., 02-093 Warsaw, Poland;

<sup>4</sup> Biological and Chemical Research Centre, 101 Żwirki i Wigury St., 02-097 Warsaw, Poland; bwilenska@chem.uw.edu.pl

<sup>5</sup> Laboratory of Pharmacognosy and Chemistry of Natural Products, Faculty of Pharmacy, National and Kapodistrian University of Athens, Panepistimiopolis, 15771 Athens, Greece; kgraikou@pharm.uoa.gr (K.G.); ichinou@pharm.uoa.gr (I.C.)

\* Correspondence: katarzyna.syklowska-baranek@wum.edu.pl

**Table S4.** Mass spectra of rosmarinic and lithospermic B acids detected in examined extracts of shoot and root *Rindera graeca* lines.

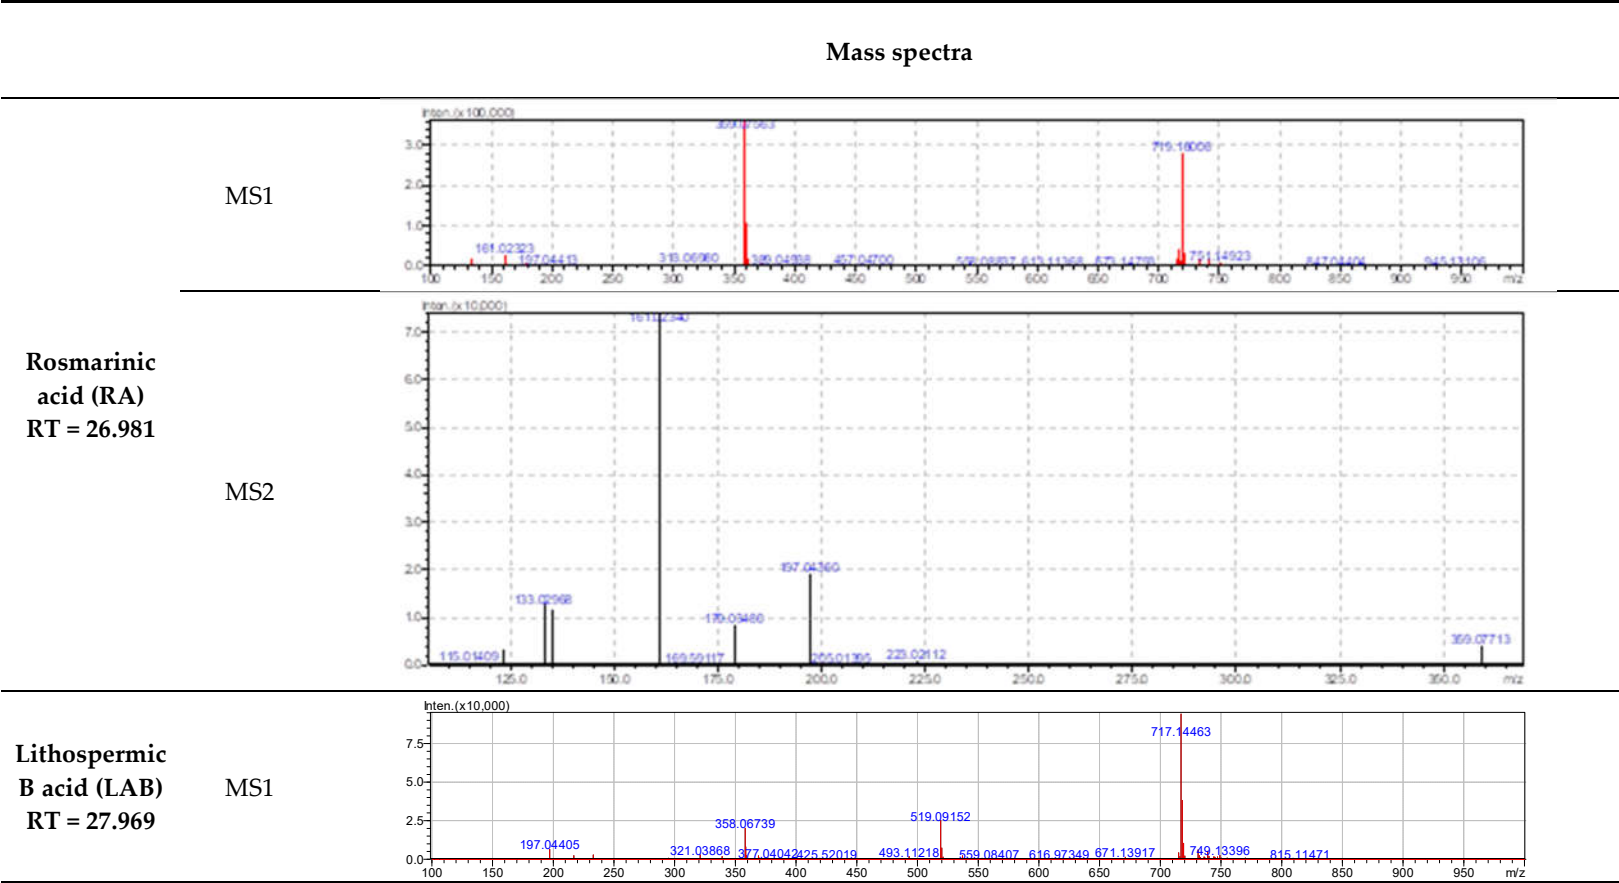

MS2

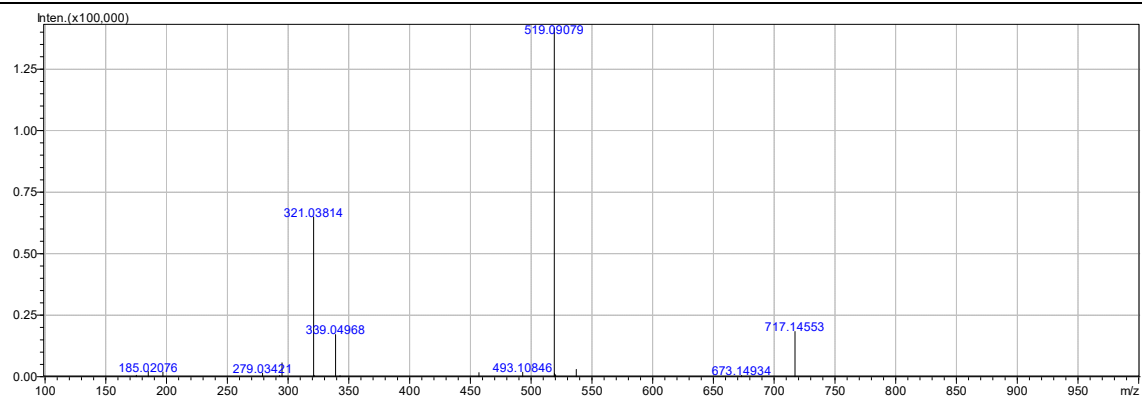

RA MS1

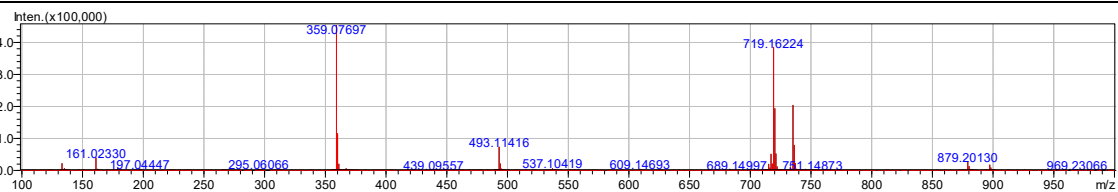

RgS  
shoots

RA MS2

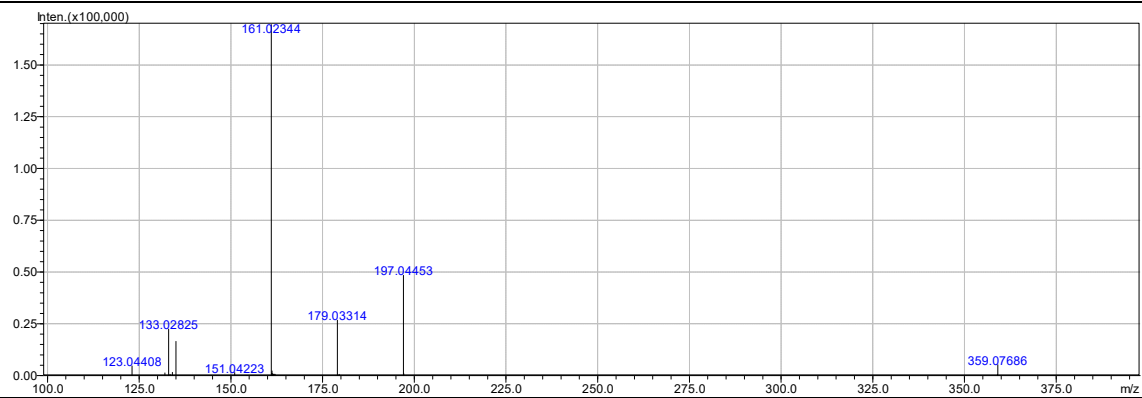

LAB MS1

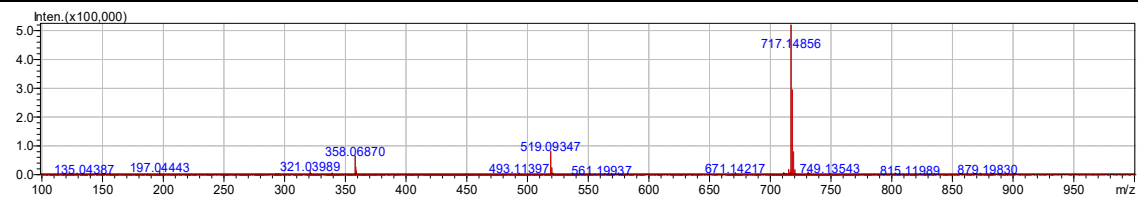

LAB MS2

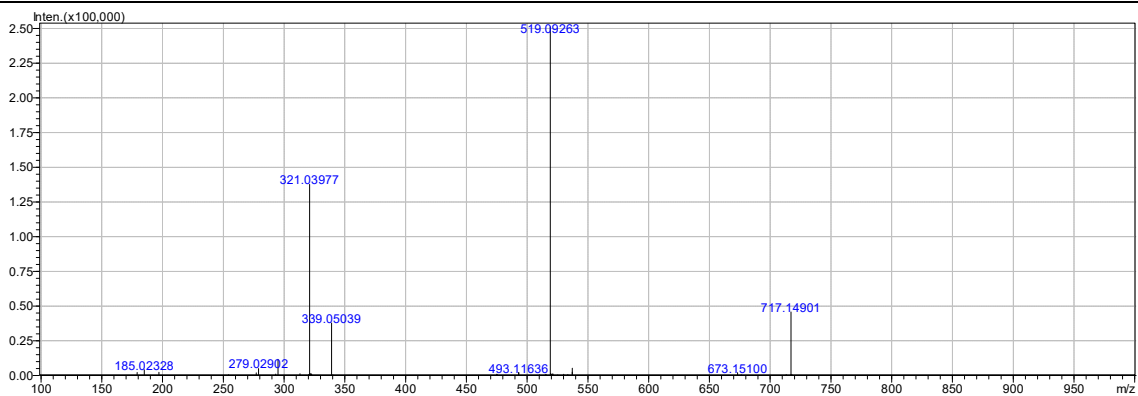

RgAR shoots RA MS1

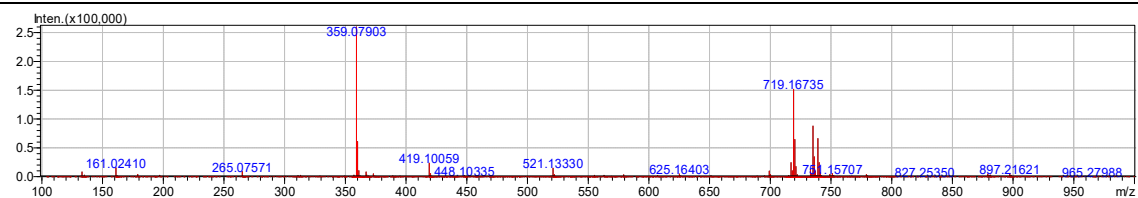

RA MS2

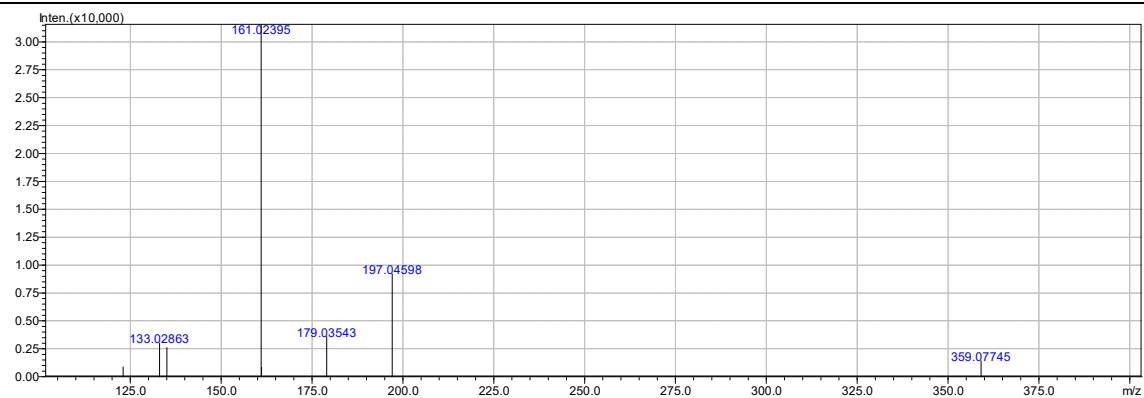

LAB MS1

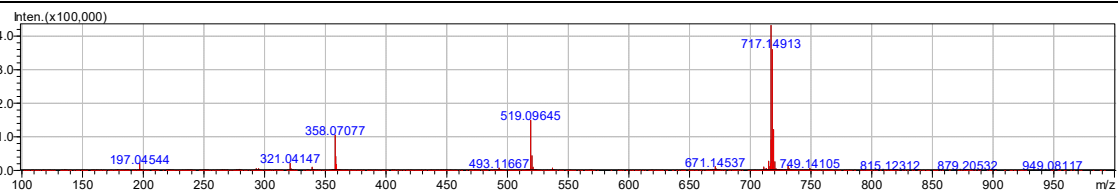

LAB MS2

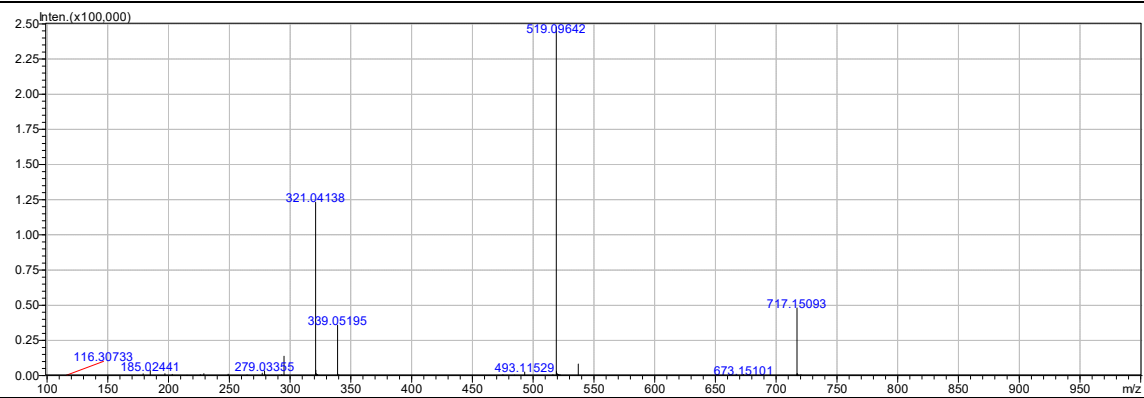

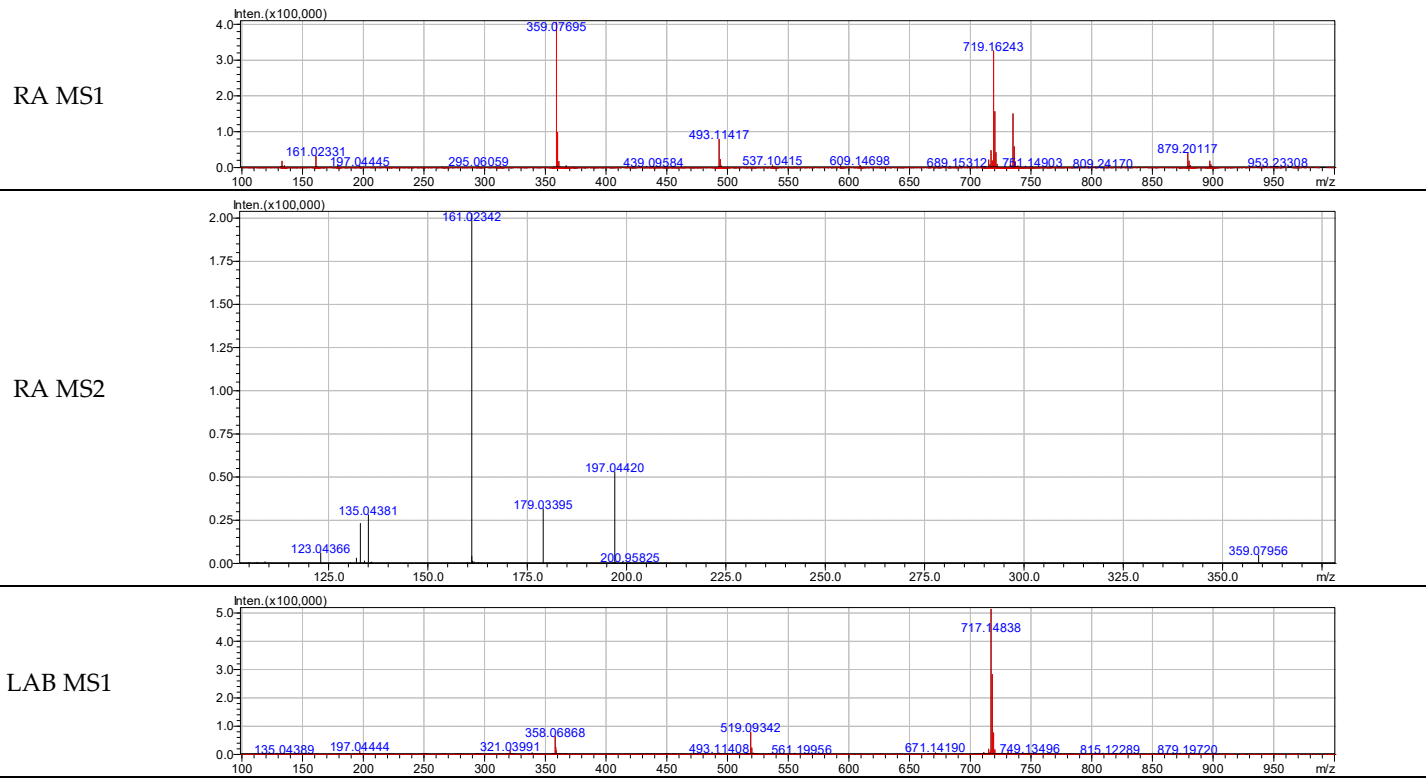

LAB MS2

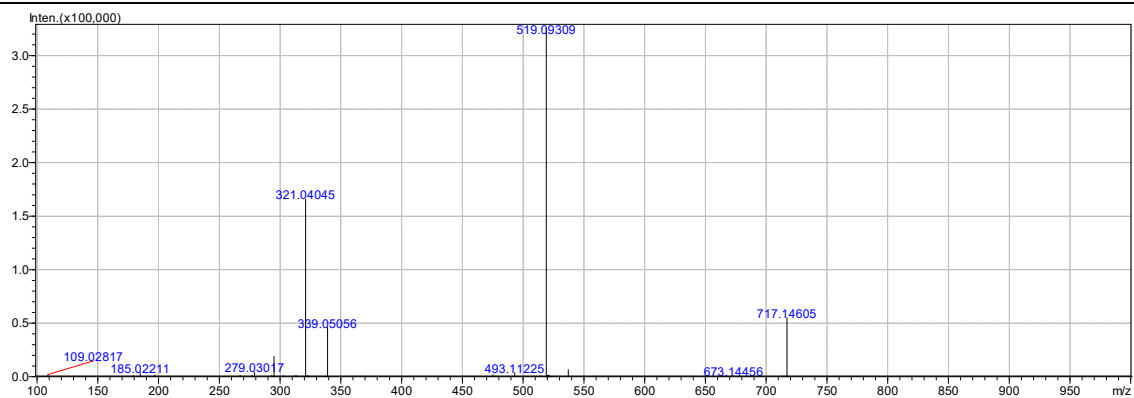

RA MS1

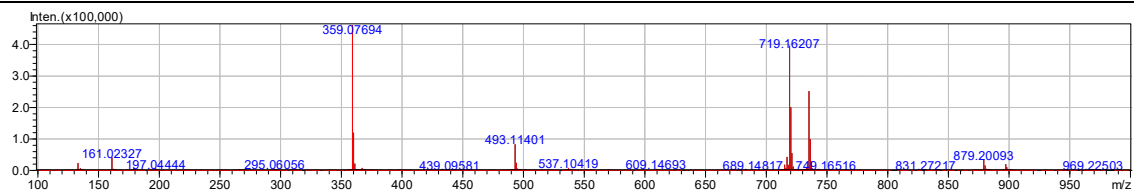

RgTR7  
shoots

RA MS2

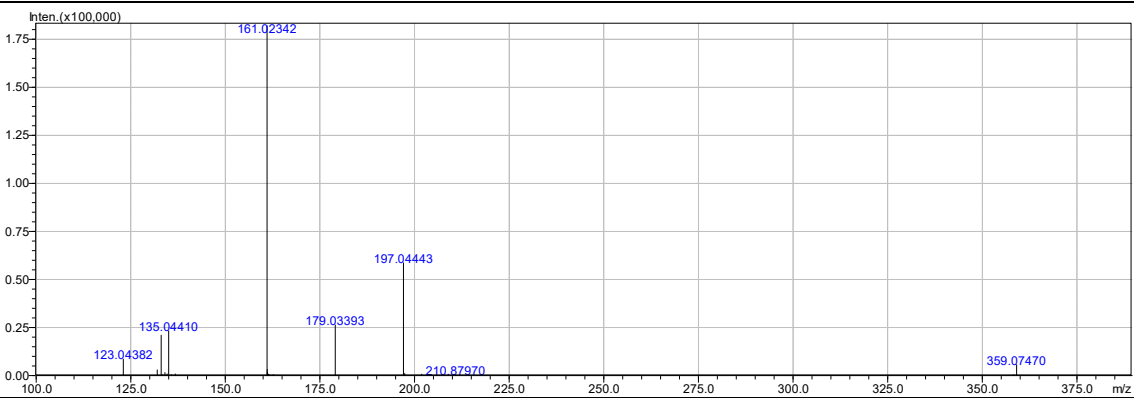

LAB MS1

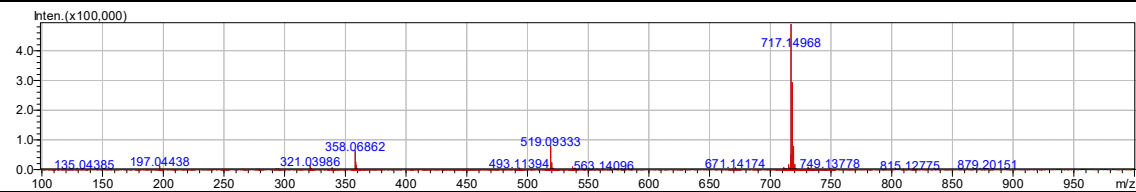

LAB MS2

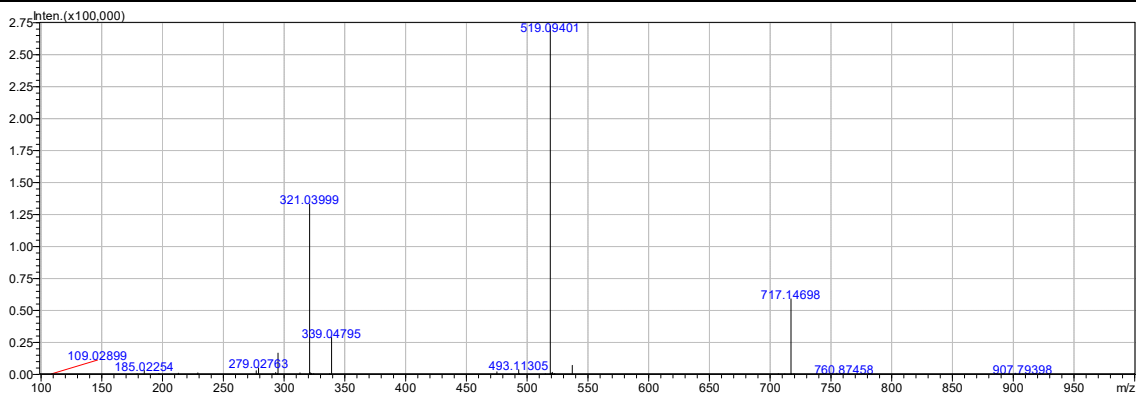

RA MS1

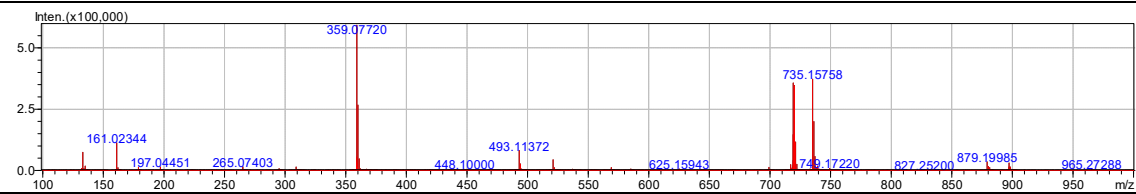

RgTR17  
shoots

RA MS2

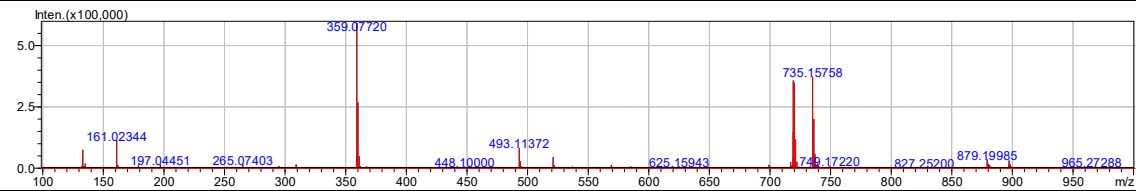



LAB MS1

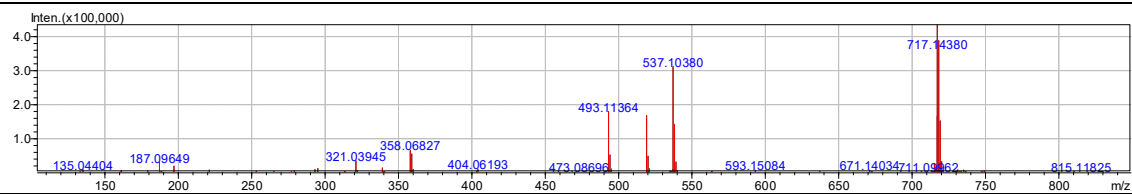

LAB MS2

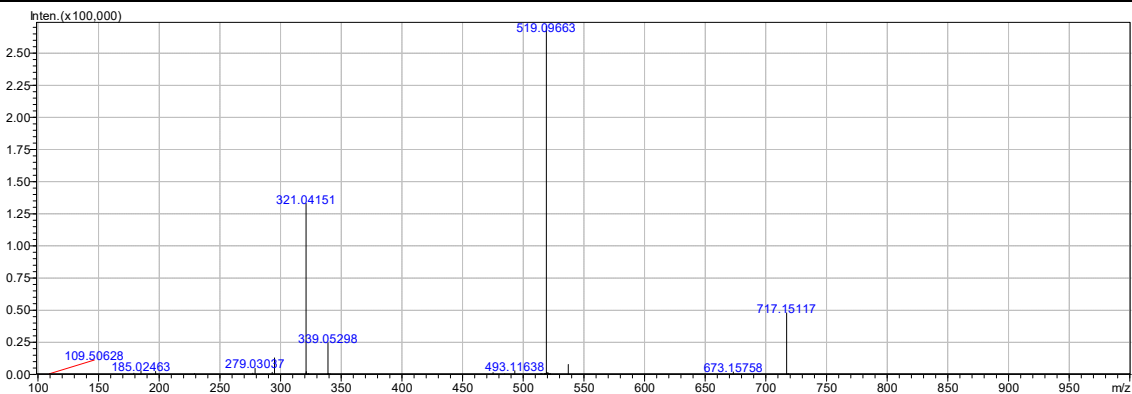

RgAR roots RA MS1

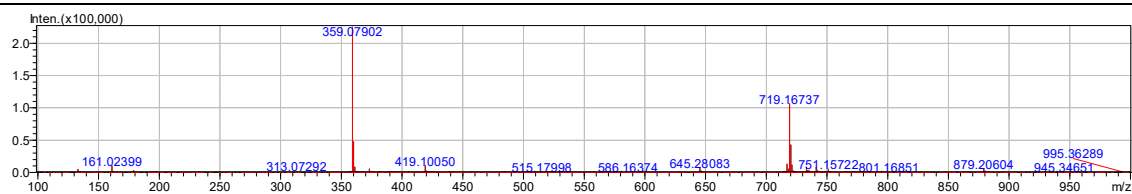

RA MS2

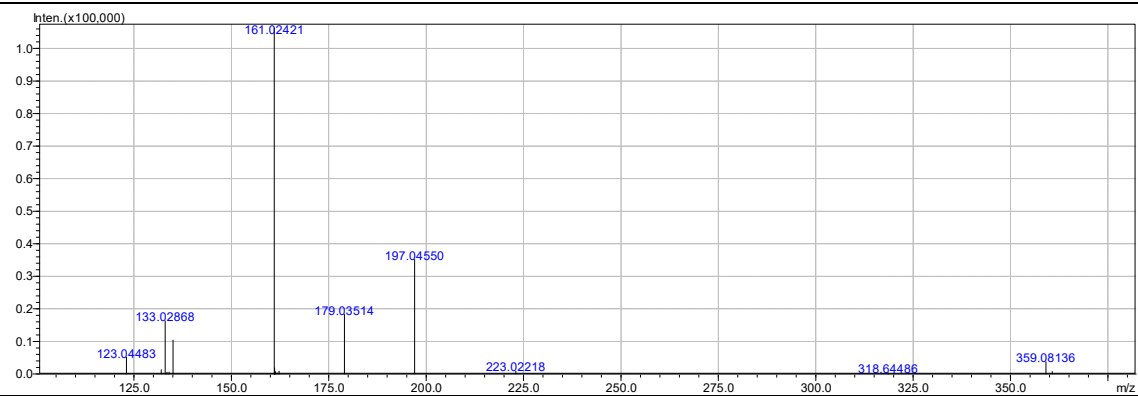

LAB MS1

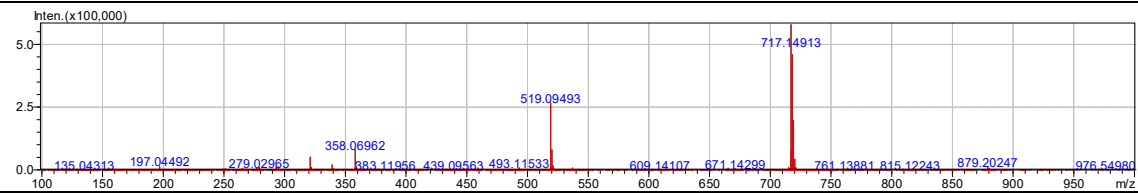

LAB MS2

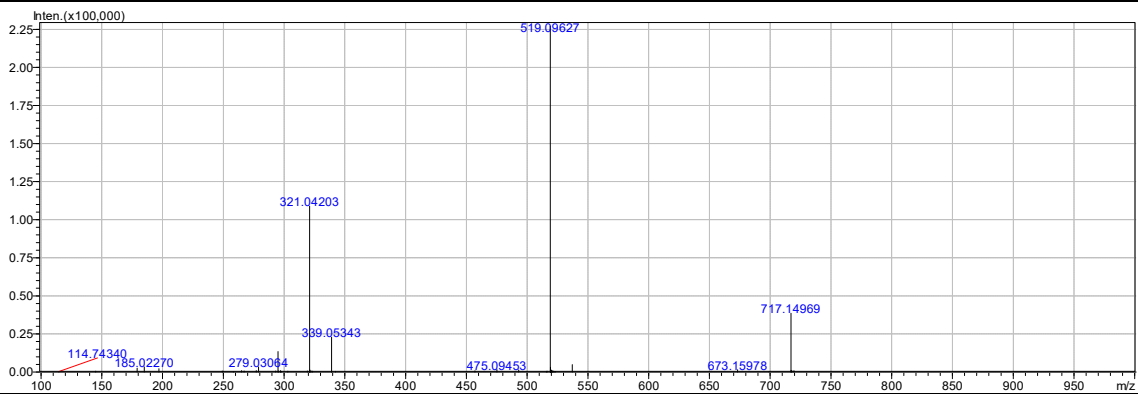

RgCR/NOA  
roots

RA MS1

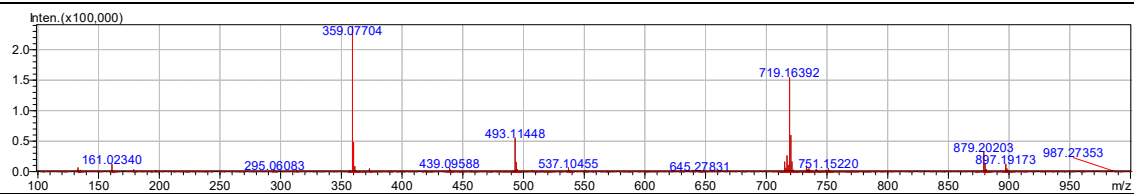

RA MS2

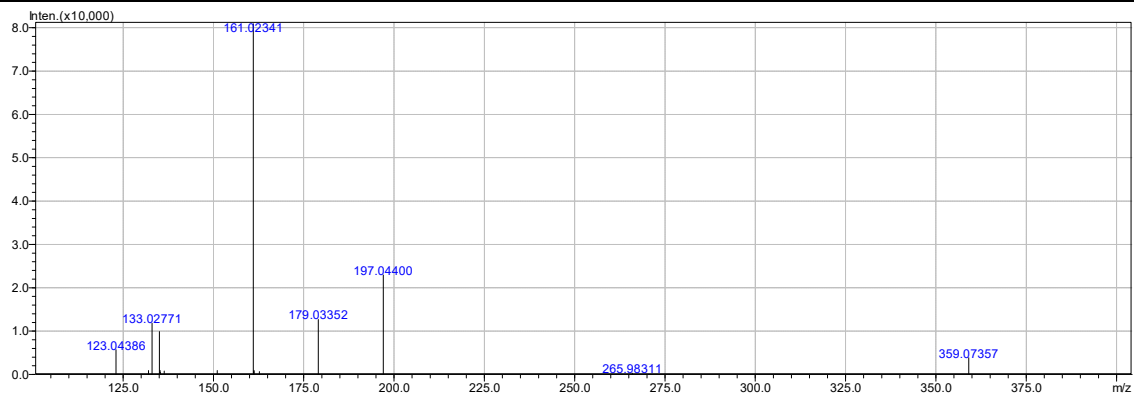

LAB MS1

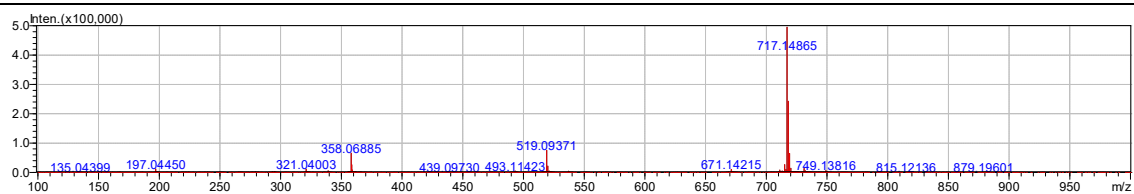

LAB MS2

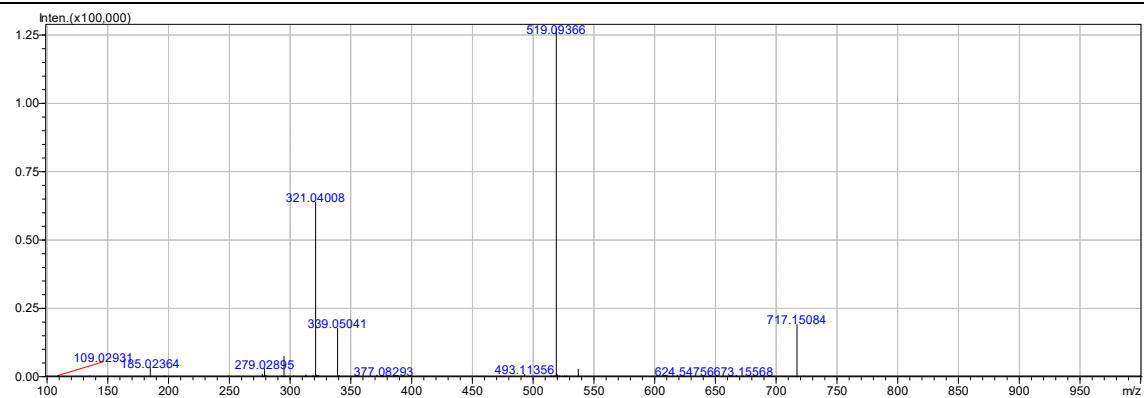

RA MS1

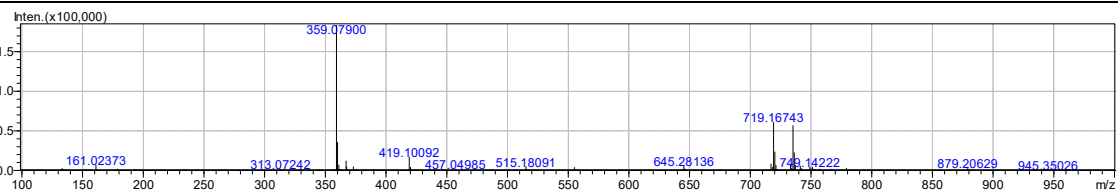

RgTR7 roots

RA MS2

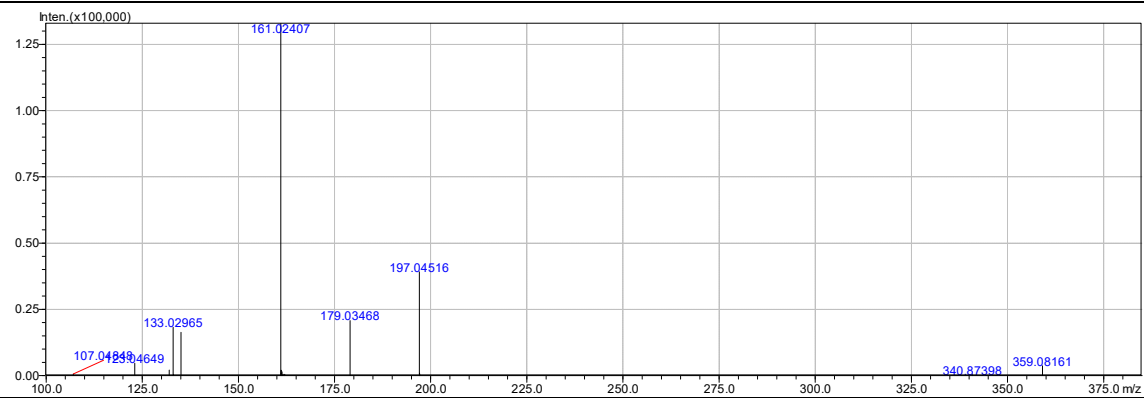

LAB MS1

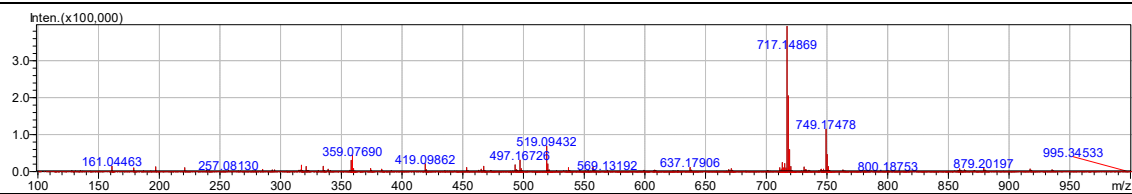

LAB MS2

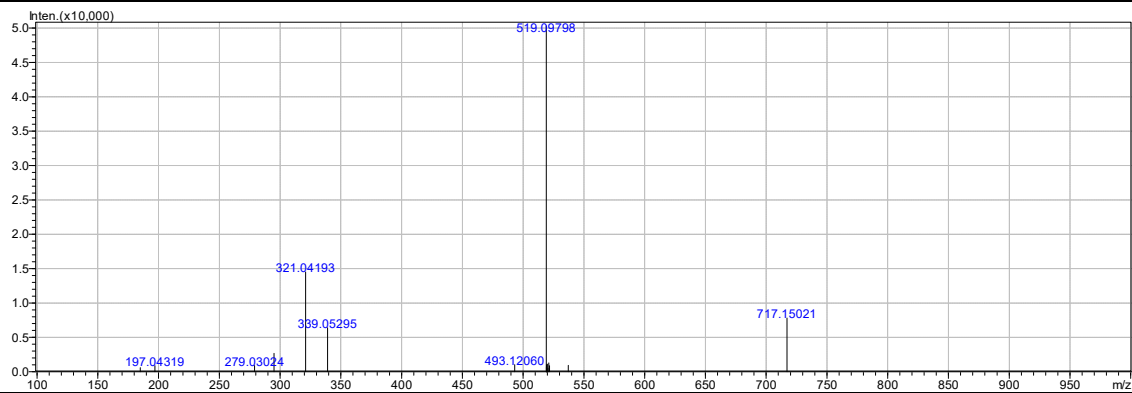

RgTR17  
roots

RA MS1

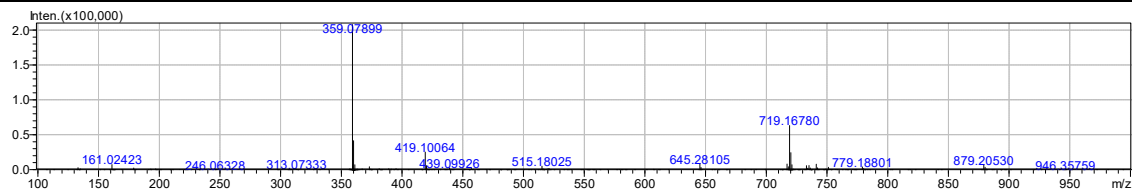

RA MS2

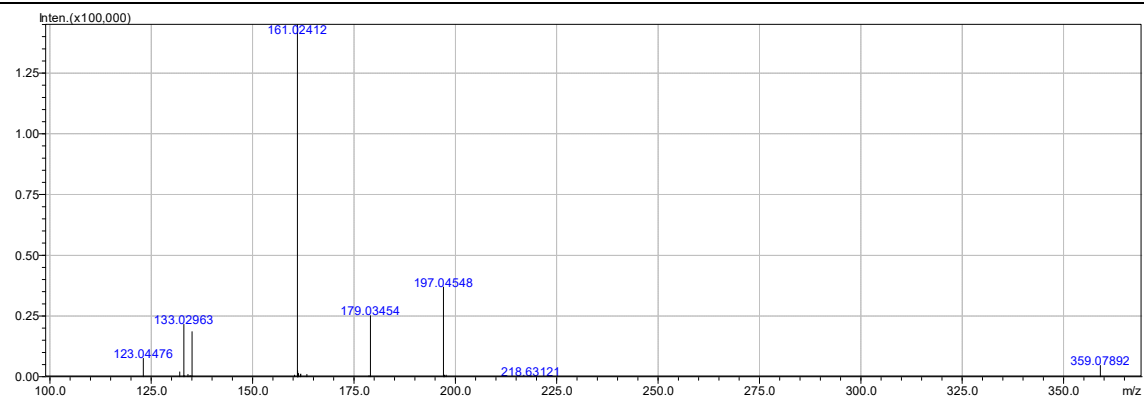

LAB MS1

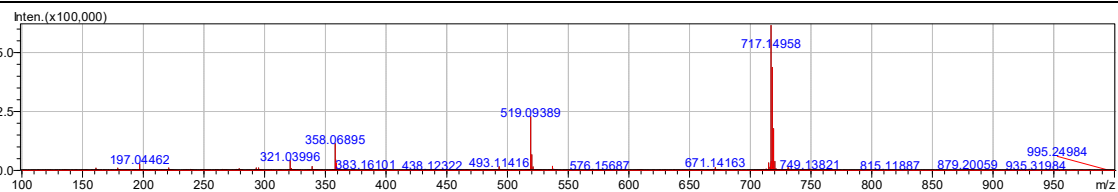

LAB MS2

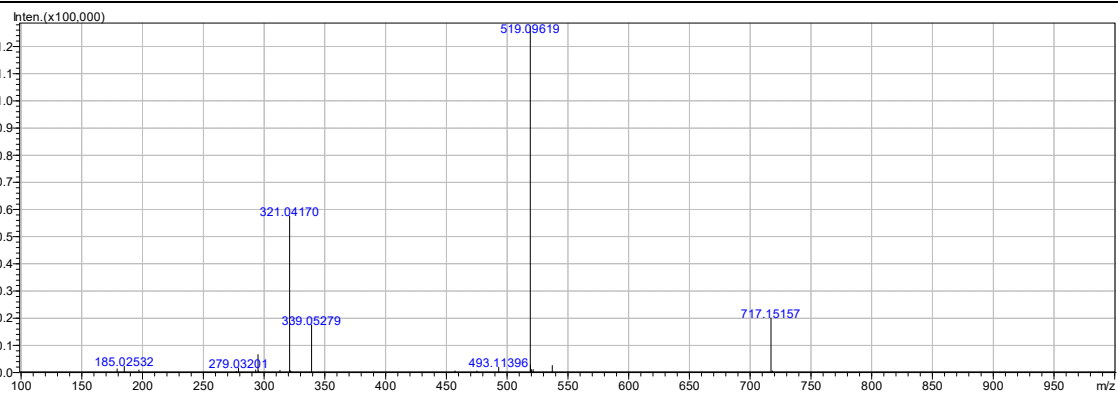

Supplement: s1 [file s1]
