# Supplementary material for: Rindera graeca (A. DC.) Boiss. & Heldr. (Boraginaceae) In Vitro Cultures Targeting Lithospermic Acid B and Rosmarinic Acid Production
Source: MDPI journal article supplement (doi:10.3390/molecules28124880), 2023-06-20
Supplement: s1 [file s1]

# ***Rindera graeca* (A. DC.) Boiss. & Heldr. (Boraginaceae) in vitro cultures targeting lithospermic acid B and rosmarinic acid production**

Katarzyna Sykłowska-Baranek <sup>1\*</sup>, Małgorzata Gawel <sup>1</sup>, Łukasz Kuźma <sup>2</sup>, Beata Wileńska <sup>3,4</sup>, Mateusz Kawka <sup>1</sup>, Małgorzata Jeziorek <sup>1</sup>, Konstantia Graikou <sup>5</sup>, Ioanna Chinou <sup>5</sup>, Ewa Szyszko <sup>1</sup>, Piotr Stępień <sup>1</sup>, Patryk Zakrzewski <sup>1</sup> and Agnieszka Pietrosiuk <sup>1</sup>

<sup>1</sup> Department of Pharmaceutical Biology, Faculty of Pharmacy, Medical University of Warsaw, 1 Banacha St., 02-097 Warsaw, Poland; mgawel1@wum.edu.pl (M.G.); mateusz.kawka@wum.edu.pl (M.K.); mjeziorek@wum.edu.pl (M.J.); przyzmik16@op.pl (E.S.); piotrste1@wp.pl (P.S.); patrol20013@gmail.com (P.Z.); agnieszka.pietrosiuk@wum.edu.pl (A.P.)

<sup>2</sup> Department of Biology and Pharmaceutical Botany, Faculty of Pharmacy, Medical University of Łódź, 1 Muszyńskiego, 90-151 Łódź, Poland; lukasz.kuzma@umed.lodz.pl

<sup>3</sup> Faculty of Chemistry, University of Warsaw, 1 Pasteura St., 02-093 Warsaw, Poland;

<sup>4</sup> Biological and Chemical Research Centre, 101 Żwirki i Wigury St., 02-097 Warsaw, Poland; bwilenska@chem.uw.edu.pl

<sup>5</sup> Laboratory of Pharmacognosy and Chemistry of Natural Products, Faculty of Pharmacy, National and Kapodistrian University of Athens, Panepistimiopolis, 15771 Athens, Greece; kgraikou@pharm.uoa.gr (K.G.); ichinou@pharm.uoa.gr (I.C.)

\* Correspondence: katarzyna.syklowska-baranek@wum.edu.pl

**Table S1.** Auxiliary shoot formation of *Rindera graeca* explants derived from seedlings after 4 weeks of culture on various modifications of DCR medium.

| Medium | Growth regulator (mg/L) | Mean shoot number/explant | Shoot description                     |
|--------|-------------------------|---------------------------|---------------------------------------|
| DCR    | BAP 0.5                 | 7.2 ± 3                   | dark green leaves, luxuriant rosettes |
| DCR/M  | BAP 0.5                 | 5.5 ± 3                   | light green leaves                    |
| DCR/S  | BAP 0.5                 | 5.6 ± 4                   | light green leaves                    |
| DCR/SV | BAP 0.5                 | 4.5 ± 3                   | light green leaves                    |
| DCR    | BAP 1                   | 4.8 ± 4                   | yellow-green leaves                   |
| DCR/M  | BAP 1                   | 3.7 ± 3                   | yellow-green leaves                   |
| DCR/S  | BAP 1                   | 6.6 ± 3                   | yellow green leaves                   |
| DCR/SV | BAP 1                   | 5.9 ± 3                   | yellow green leaves                   |
| DCR    | KIN 0.5                 | 3.0 ± 2                   | light green leaves                    |
| DCR/M  | KIN 0.5                 | 1.8 ± 2                   | yellow green leaves                   |
| DCR/S  | KIN 0.5                 | 4.6 ± 3                   | yellow green leaves                   |
| DCR/SV | KIN 0.5                 | 7.1 ± 5                   | light green leaves                    |
| DCR    | KIN 1                   | 4.6 ± 3                   | yellow-green leaves                   |
| DCR/M  | KIN 1                   | 2.0 ± 3                   | yellow-green leaves                   |
| DCR/S  | KIN 1                   | 2.5 ± 2                   | yellow-green leaves                   |
| DCR/SV | KIN 1                   | 3.9 ± 3                   | yellow-green leaves                   |

Data represents means ± SD.

DCR – full strength DCR medium; DCR/M – DCR medium with reduced to half content of macroelements; DCR/S – DCR medium with reduced to half content of macro- and microelements; DCR/SV - DCR medium with reduced to half content of macro-, microelements and vitamins.
