# Supplementary material for: Rindera graeca (A. DC.) Boiss. & Heldr. (Boraginaceae) In Vitro Cultures Targeting Lithospermic Acid B and Rosmarinic Acid Production
Source: MDPI journal article supplement (doi:10.3390/molecules28124880), 2023-06-20
Supplement: s1 [file s1]

# ***Rindera graeca* (A. DC.) Boiss. & Heldr. (Boraginaceae) in vitro cultures targeting lithospermic acid B and rosmarinic acid production**

Katarzyna Sykłowska-Baranek <sup>1\*</sup>, Małgorzata Gawel <sup>1</sup>, Łukasz Kuźma <sup>2</sup>, Beata Wileńska <sup>3,4</sup>, Mateusz Kawka <sup>1</sup>, Małgorzata Jeziorek <sup>1</sup>, Konstantia Graikou <sup>5</sup>, Ioanna Chinou <sup>5</sup>, Ewa Szyszko <sup>1</sup>, Piotr Stępień <sup>1</sup>, Patryk Zakrzewski <sup>1</sup> and Agnieszka Pietrosiuk <sup>1</sup>

<sup>1</sup> Department of Pharmaceutical Biology, Faculty of Pharmacy, Medical University of Warsaw, 1 Banacha St., 02-097 Warsaw, Poland; mgawel1@wum.edu.pl (M.G.); mateusz.kawka@wum.edu.pl (M.K.); mjeziorek@wum.edu.pl (M.J.); przyzmik16@op.pl (E.S.); piotrste1@wp.pl (P.S.); patrol20013@gmail.com (P.Z.); agnieszka.pietrosiuk@wum.edu.pl (A.P.)

<sup>2</sup> Department of Biology and Pharmaceutical Botany, Faculty of Pharmacy, Medical University of Łódź, 1 Muszyńskiego, 90-151 Łódź, Poland; lukasz.kuzma@umed.lodz.pl

<sup>3</sup> Faculty of Chemistry, University of Warsaw, 1 Pasteura St., 02-093 Warsaw, Poland;

<sup>4</sup> Biological and Chemical Research Centre, 101 Żwirki i Wigury St., 02-097 Warsaw, Poland; bwilenska@chem.uw.edu.pl

<sup>5</sup> Laboratory of Pharmacognosy and Chemistry of Natural Products, Faculty of Pharmacy, National and Kapodistrian University of Athens, Panepistimiopolis, 15771 Athens, Greece; kgraikou@pharm.uoa.gr (K.G.); ichinou@pharm.uoa.gr (I.C.)

\* Correspondence: katarzyna.syklowska-baranek@wum.edu.pl

**Table S3.** Dice similarity coefficient [%].

| Shoot/root line        | RgAR-shoots | RgAR-roots | RgCR/NOA-shoots | RgCR/NOA-roots | RgTR7-shoots | RgTR7-roots | RgTR17-shoots | RgTR17-roots | RgS shoots |
|------------------------|-------------|------------|-----------------|----------------|--------------|-------------|---------------|--------------|------------|
| <b>RgAR-shoots</b>     |             | 68.153     | 81.955          | 79.012         | 89.744       | 68.831      | 86.066        | 62.759       | 81.481     |
| <b>RgAR-roots</b>      | 68.153      |            | 82.123          | 75.2244        | 71.779       | 96.500      | 75.000        |              |            |
| <b>RgCR/NOA-shoots</b> | 81.955      | 82.123     |                 | 86.411         | 82.734       | 81.250      | 86.111        |              |            |
| <b>RgCR/NOA-roots</b>  | 79.012      | 75.224     | 86.411          |                | 81.569       | 74.164      | 80.755        |              |            |
| <b>RgTR7 shoots</b>    | 89.744      | 71.779     | 82.734          | 81.569         |              | 73.125      | 86.719        |              |            |
| <b>RgTR7 roots</b>     | 68.831      | 96.500     | 81.250          | 74.164         | 73.125       |             | 73.939        |              |            |
| <b>RgTR17 shoots</b>   | 86.066      | 75.000     | 86.111          | 80.755         | 86.719       | 73.939      |               |              |            |
| <b>RgTR17 roots</b>    | 63.514      | 91.753     | 76.471          | 73.186         | 68.831       | 91.099      | 71.069        |              |            |
| <b>RgS shoots</b>      | 81.418      | 65.584     | 76.923          | 74.262         | 83.333       | 66.225      | 82.353        |              |            |
