# Supplementary material for: Rindera graeca (A. DC.) Boiss. & Heldr. (Boraginaceae) In Vitro Cultures Targeting Lithospermic Acid B and Rosmarinic Acid Production
Source: MDPI journal article supplement (doi:10.3390/molecules28124880), 2023-06-20
Supplement: s1 [file s1]

# ***Rindera graeca* (A. DC.) Boiss. & Heldr. (Boraginaceae) in vitro cultures targeting lithospermic acid B and rosmarinic acid production**

Katarzyna Sykłowska-Baranek <sup>1\*</sup>, Małgorzata Gawel <sup>1</sup>, Łukasz Kuźma <sup>2</sup>, Beata Wileńska <sup>3,4</sup>, Mateusz Kawka <sup>1</sup>, Małgorzata Jeziorek <sup>1</sup>, Konstantia Graikou <sup>5</sup>, Ioanna Chinou <sup>5</sup>, Ewa Szyszko <sup>1</sup>, Piotr Stępień <sup>1</sup>, Patryk Zakrzewski <sup>1</sup> and Agnieszka Pietrosiuk <sup>1</sup>

<sup>11</sup> Department of Pharmaceutical Biology, Faculty of Pharmacy, Medical University of Warsaw, 1 Banacha St., 02-097 Warsaw, Poland; mgawel1@wum.edu.pl (M.G.); mateusz.kawka@wum.edu.pl (M.K.); mjeziorek@wum.edu.pl (M.J.); pryzmik16@op.pl (E.S.); piotrste1@wp.pl (P.S.); patrol20013@gmail.com (P.Z.); agnieszka.pietrosiuk@wum.edu.pl (A.P.)

<sup>2</sup> Department of Biology and Pharmaceutical Botany, Faculty of Pharmacy, Medical University of Łódź, 1 Muszyńskiego, 90-151 Łódź, Poland; lukasz.kuzma@umed.lodz.pl

<sup>3</sup> Faculty of Chemistry, University of Warsaw, 1 Pasteura St., 02-093 Warsaw, Poland;

<sup>4</sup> Biological and Chemical Research Centre, 101 Żwirki i Wigury St., 02-097 Warsaw, Poland; bwilenska@chem.uw.edu.pl

<sup>5</sup> Laboratory of Pharmacognosy and Chemistry of Natural Products, Faculty of Pharmacy, National and Kapodistrian University of Athens, Panepistimiopolis, 15771 Athens, Greece; kgraikou@pharm.uoa.gr (K.G.); ichinou@pharm.uoa.gr (I.C.)

\* Correspondence: katarzyna.syklowska-baranek@wum.edu.pl

**Table S2.** OPA primers sequence used to estimate genetic diversity of cultured *in vitro* shoot and root lines of *Rindera graeca* in RAPD reaction.

| Primer name | Primer 5'  | 3'sequence |
|-------------|------------|------------|
| OPA01       | CAGGCCCTTC |            |
| OPA02       | TGCCGAGCTG |            |
| OPA03       | AGTCAGCCAC |            |
| OPA04       | AATCGGGCTG |            |
| OPA05       | AGGGGTCTTG |            |
| OPA06       | GGTCCCTGAC |            |
| OPA07       | GAAACGGGTG |            |
| OPA08       | GTGACGTAGG |            |
| OPA09       | GGGTAACGCC |            |
| OPA10       | GTGATCGCAG |            |
| OPA11       | GTGATCGCAG |            |
| OPA12       | TCGGCGATAG |            |
| OPA13       | CAGCACCCAC |            |
| OPA14       | TCTGTGCTGG |            |
| OPA15       | TTCCGAACCC |            |
| OPA16       | AGCCAGCGAA |            |
| OPA17       | GACCGCTTGT |            |
| OPA18       | AGGTGACCGT |            |
| OPA19       | CAAACGTCGG |            |
| OPA20       | GTTGCGATCC |            |
