# Supplementary material for: Rindera graeca (A. DC.) Boiss. & Heldr. (Boraginaceae) In Vitro Cultures Targeting Lithospermic Acid B and Rosmarinic Acid Production
Source: MDPI journal article supplement (doi:10.3390/molecules28124880), 2023-06-20
Supplement: s1 [file s1]

# ***Rindera graeca* (A. DC.) Boiss. & Heldr. (Boraginaceae) in vitro cultures targeting lithospermic acid B and rosmarinic acid production**

Katarzyna Sykłowska-Baranek <sup>1\*</sup>, Małgorzata Gawel <sup>1</sup>, Łukasz Kuźma <sup>2</sup>, Beata Wileńska <sup>3,4</sup>,  
Mateusz Kawka <sup>1</sup>, Małgorzata Jeziorek <sup>1</sup>, Konstantia Graikou <sup>5</sup>, Ioanna Chinou <sup>5</sup>, Ewa Szyszko <sup>1</sup>,  
Piotr Stępień <sup>1</sup>, Patryk Zakrzewski <sup>1</sup> and Agnieszka Pietrosiuk <sup>1</sup>

<sup>1</sup> Department of Pharmaceutical Biology, Faculty of Pharmacy, Medical University of Warsaw, 1 Banacha St., 02-097 Warsaw, Poland; mgawel1@wum.edu.pl (M.G.); mateusz.kawka@wum.edu.pl (M.K.); mjeziorek@wum.edu.pl (M.J.); przyzmik16@op.pl (E.S.); piotrste1@wp.pl (P.S.); patrol20013@gmail.com (P.Z.); agnieszka.pietrosiuk@wum.edu.pl (A.P.)

<sup>2</sup> Department of Biology and Pharmaceutical Botany, Faculty of Pharmacy, Medical University of Łódź, 1 Muszyńskiego, 90-151 Łódź, Poland; lukasz.kuzma@umed.lodz.pl

<sup>3</sup> Faculty of Chemistry, University of Warsaw, 1 Pasteura St., 02-093 Warsaw, Poland;

<sup>4</sup> Biological and Chemical Research Centre, 101 Żwirki i Wigury St., 02-097 Warsaw, Poland; bwilenska@chem.uw.edu.pl

<sup>5</sup> Laboratory of Pharmacognosy and Chemistry of Natural Products, Faculty of Pharmacy, National and Kapodistrian University of Athens, Panepistimiopolis, 15771 Athens, Greece; kgraikou@pharm.uoa.gr (K.G.); ichinou@pharm.uoa.gr (I.C.)

\* Correspondence: katarzyna.syklowska-baranek@wum.edu.pl

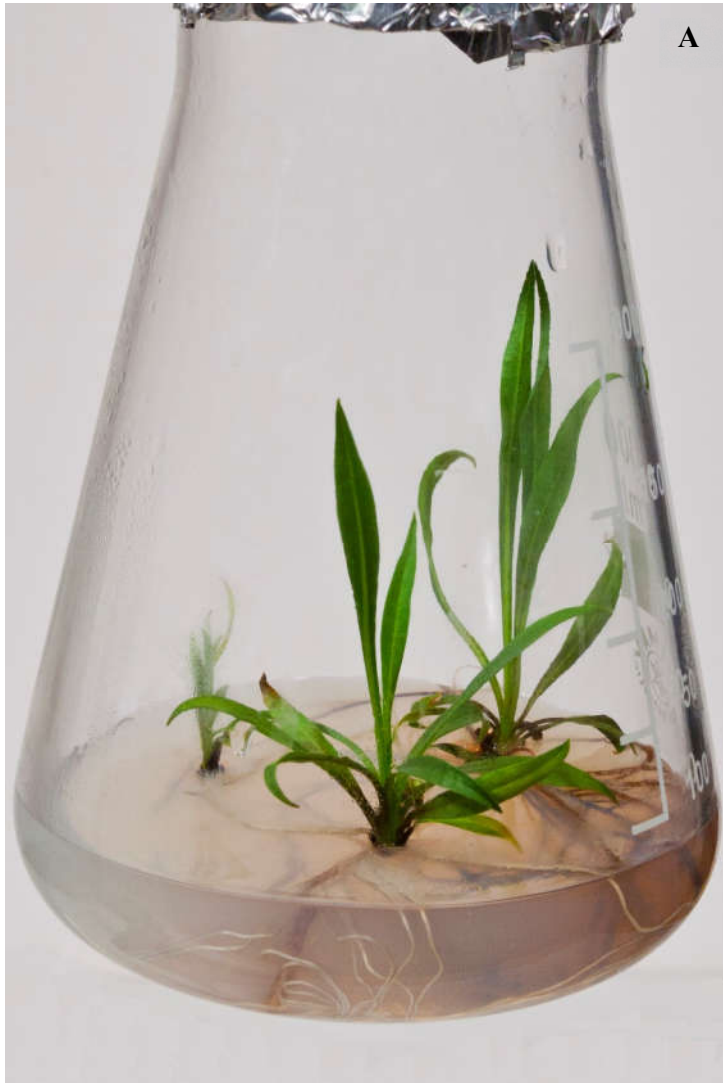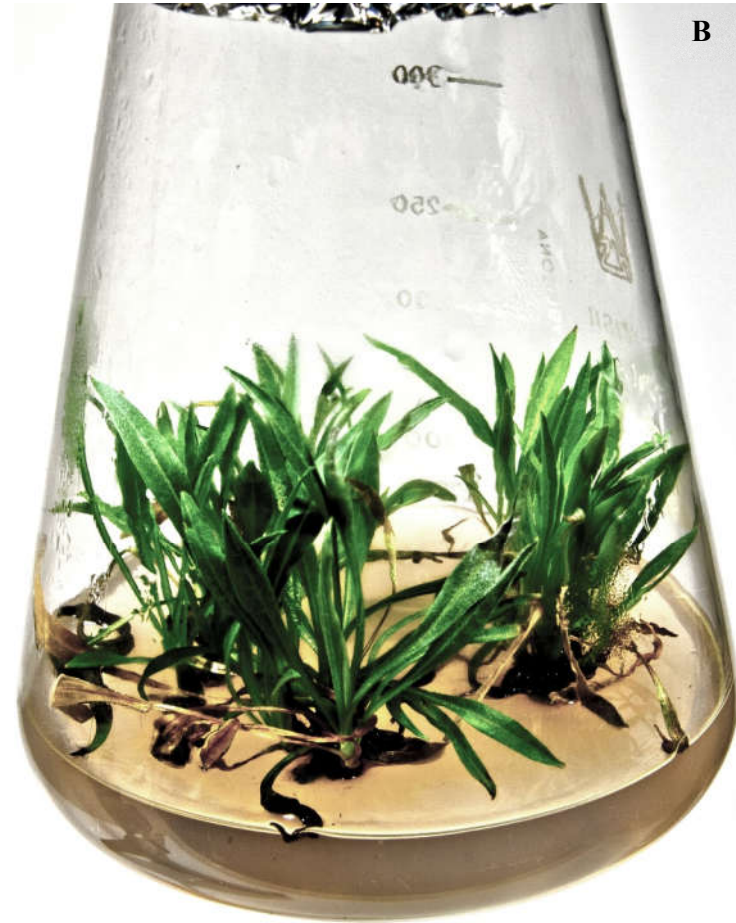

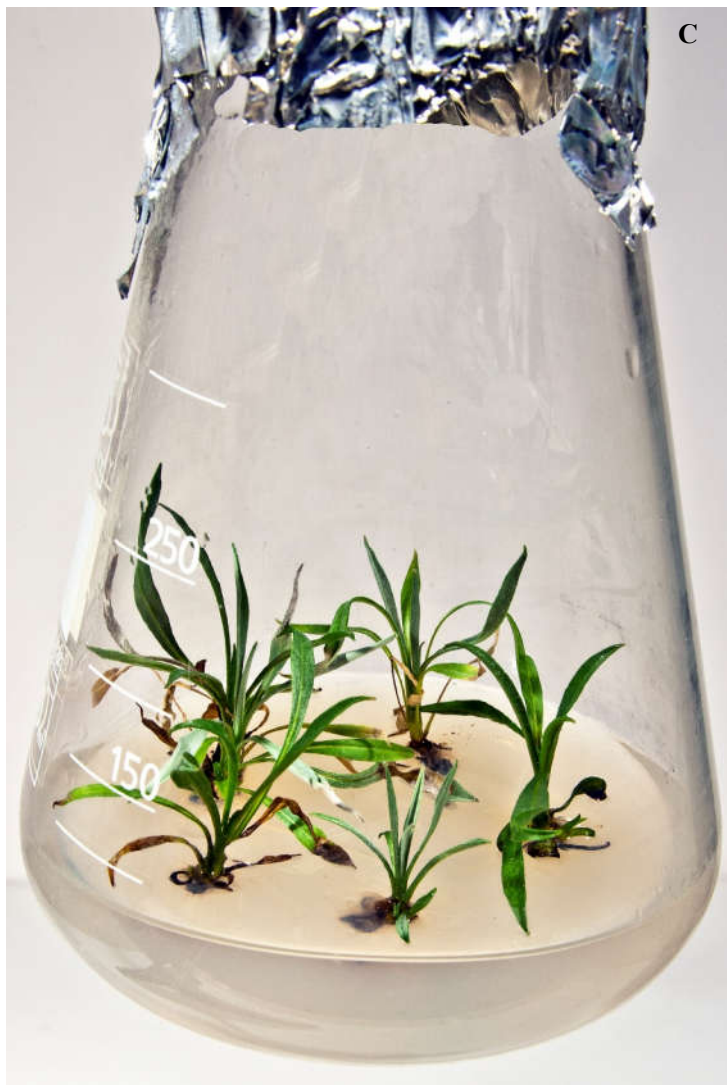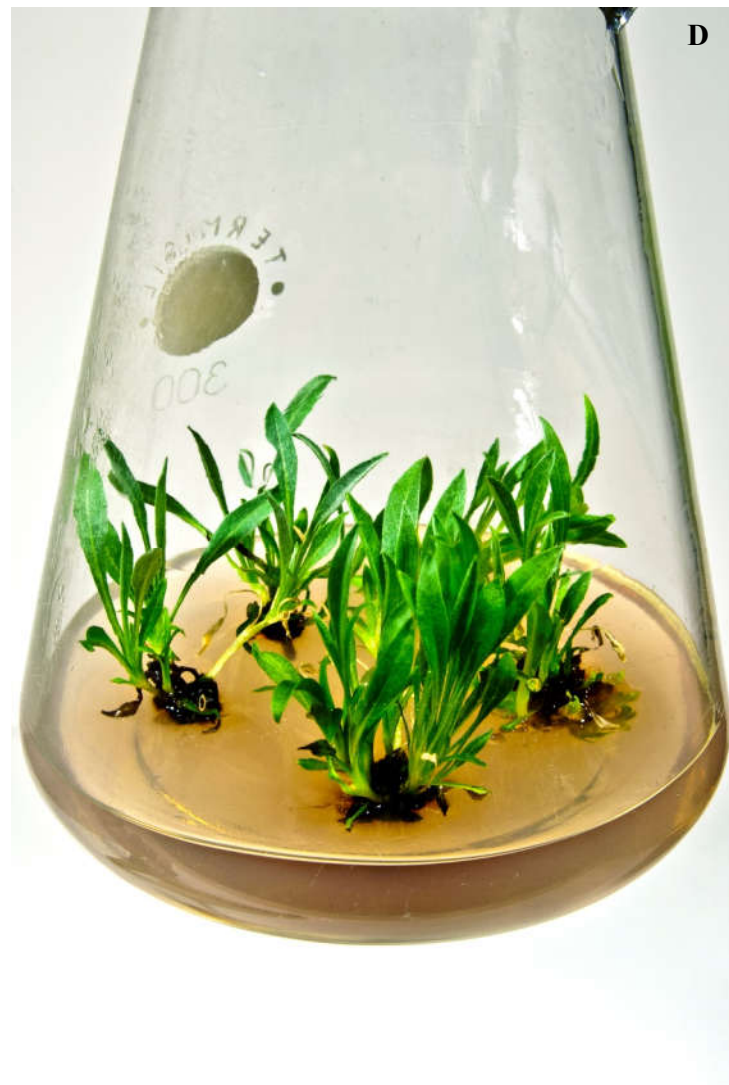

**Figure S1.** Shoots regenerated from root explants of RgCR/NOA root line cultivated on solid hormone-free DCR medium (A) or (B) on DCR medium supplemented with 0.5 mg/L BAP; (C) shoots regenerated from explants of RgTR17 hairy root line and cultivated, after separation from roots, for four weeks on hormone-free SH medium or (D) on SH medium supplemented with 0.5 mg/L BAP. The cultures were performed at 16h/8h (light/dark) photoperiod with light provided by cool-white fluorescent lamps ( $40 \mu\text{M}/\text{m}^2/\text{s}^1$ ).
